# Supplementary material for: Large-Scale Sequence Analysis of Hemagglutinin of Influenza A Virus Identifies Conserved Regions Suitable for Targeting an Anti-Viral Response
Source: PLoS One. 2010 Feb 17;5(2):e9268. doi: 10.1371/journal.pone.0009268 (PMC2822852; doi:10.1371/journal.pone.0009268)
Supplement: Table S1 — Correlation score of H2 with other subtypes at each amino acid residue in HA1 domain. The data obtained from muscle and compass alignments was tabulated. The H3 sequence (PDB: 1HGJ) was added to follow the H3 numbering. The consensus residue at each amino acid position, the frequency of consensus residue, correlation of H2 with other subtypes and the final conservation score at each amino acid position is shown. (0.10 MB XLS) [file pone.0009268.s001.xls]

## Sheet: results
H2			H1				H3				H5
Column Number	Consensus Residue	Frequency of Consensus	Column Number	Consensus Residue	Frequency of Consensus	Correlation with H2	Column Number	Consensus Residue	Frequency of Consensus	Correlation with H2	Column Number	Consensus Residue	Frequency of Consensus	Correlation with H2	Residue Numbering from 1HGJ	Final conservation Score
20	I	1	19	V	0.88	0.12	-	-	-	0	18	L	0.62	0	-	0
21	L	1	20	L	1	1	-	-	-	0	19	A	0.92	0	-	0
22	L	1	21	L	0.99	0.99	-	-	-	0	20	I	0.77	0	-	0
23	F	1	24	F	0.93	0.93	-	-	-	0	21	V	0.99	0	-	0
24	T	0.9	25	T	0.93	0.84	-	-	-	0	22	S	1	0.03	-	0
25	A	0.94	26	A	1	0.93	-	-	-	0	23	L	0.98	0	-	0
26	V	1	27	T	0.98	0	-	-	-	0	24	V	1	1	-	0
27	R	1	28	Y	0.88	0	-	-	-	0	25	K	1	0	-	0
28	G	1	29	A	1	0	-	-	-	0	26	S	1	0	-	0
29	D	1	30	D	1	1	-	-	-	0	27	D	1	1	-	0
30	Q	1	31	T	0.99	0	-	-	-	0	28	Q	1	1	-	0
31	I	1	32	I	0.99	0.99	39	L	1	0	29	I	1	1	13	0
32	C	1	33	C	1	1	40	C	1	1	30	C	1	1	14	1
33	I	1	34	I	1	1	41	L	1	0	31	I	1	1	15	0
34	G	1	35	G	1	1	42	G	1	1	32	G	1	1	16	1
35	Y	1	36	Y	1	1	43	H	1	0	33	Y	1	1	17	0
36	H	1	37	H	1	1	44	H	1	1	34	H	1	1	18	1
37	A	0.97	38	A	1	0.96	45	A	1	0.97	35	A	1	0.97	19	0.96
38	N	1	39	N	1	1	46	V	1	0	36	N	1	1	20	0
39	N	1	40	N	1	1	47	P	1	0	37	N	1	1	21	0
40	S	1	41	S	1	1	48	N	1	0	38	S	1	1	22	0
41	T	1	42	T	1	1	49	G	1	0	39	T	1	1	23	0
42	E	1	43	D	1	0	50	T	1	0	40	E	1	1	24	0
43	K	0.84	44	T	1	0.03	51	I	0.51	0	41	Q	1	0	25	0
44	V	1	45	V	1	1	52	V	1	1	42	V	1	1	26	1
45	D	1	46	D	1	1	53	K	0.99	0	43	D	1	1	27	0
46	T	1	47	T	1	1	54	T	1	1	44	T	1	1	28	1
47	I	0.94	48	V	1	0	55	I	1	0.93	45	I	1	0.94	29	0
48	L	1	49	L	1	1	56	T	1	0	46	M	1	0	30	0
49	E	1	50	E	1	1	57	N	0.98	0	47	E	1	1	31	0
50	R	1	51	K	1	0	58	D	1	0	48	K	1	0	32	0
51	N	1	52	N	1	1	59	Q	0.97	0	49	N	1	1	33	0
52	V	1	53	V	1	1	60	I	0.99	0	50	V	1	1	34	0
53	T	1	54	T	1	1	61	E	1	0	51	T	1	1	35	0
54	V	1	55	V	1	1	62	V	1	1	52	V	1	1	36	1
55	T	1	56	T	1	1	63	T	1	1	53	T	1	1	37	1
56	H	1	57	H	1	1	64	N	1	0	54	H	1	1	38	0
57	A	1	58	S	1	0	65	A	1	1	55	A	1	1	39	0
58	K	1	59	V	1	0	66	T	1	0	56	Q	1	0	40	0
59	D	1	60	N	1	0	67	E	1	0	57	D	1	1	41	0
60	I	1	61	L	1	0	68	L	1	0	58	I	1	1	42	0
61	L	1	62	L	1	1	69	V	1	0	59	L	1	1	43	0
62	E	1	63	E	1	1	70	Q	1	0	60	E	0.99	0.99	44	0
63	K	1	64	D	0.98	0	71	S	0.97	0	61	K	0.9	0.9	45	0
64	T	1	65	S	0.95	0	72	S	1	0	62	T	0.99	0.99	46	0
65	H	1	66	H	1	1	73	S	0.97	0	63	H	1	1	47	0
66	N	1	67	N	1	1	74	T	0.99	0	64	N	1	1	48	0
67	G	1	68	G	1	1	75	G	0.97	0.97	65	G	1	1	49	0.97
68	K	1	69	K	1	1	76	G	0.47	0.02	66	K	1	1	50	0.02
69	L	1	70	L	1	1	77	I	0.99	0	67	L	1	1	51	0
70	C	1	71	C	1	1	78	C	1	1	68	C	1	1	52	1
71	K	1	72	L	0.78	0.02	79	D	0.97	0	69	D	1	0	53	0
72	L	1	73	L	1	1	80	S	0.98	0	70	L	1	1	54	0
73	N	0.97	74	K	0.99	0	80	S	0.98	0.02	71	D	0.9	0.12	54	0
74	G	1	75	G	1	1	81	P	1	0	72	G	0.99	0.99	55	0
75	I	1	76	I	0.91	0.91	82	H	1	0	73	V	1	0	56	0
76	P	1	77	A	1	0	83	Q	0.69	0	74	K	1	0	57	0
77	P	1	78	P	1	1	84	I	1	0	75	P	1	1	58	0
78	L	1	79	L	1	1	85	L	1	1	76	L	1	1	59	1
79	E	1	80	Q	0.99	0	86	D	1	0	77	I	1	0	60	0
80	L	1	81	L	1	1	87	G	1	0	78	L	1	1	61	0
81	G	1	82	G	1	1	88	E	0.71	0	79	R	0.92	0	62	0
82	D	1	83	N	0.93	0	89	N	0.99	0.01	80	D	1	1	63	0
83	C	1	84	C	1	1	90	C	1	1	81	C	1	1	64	1
84	S	1	85	S	0.95	0.95	91	T	1	0	82	S	1	1	65	0
85	I	1	86	V	0.88	0.12	92	L	1	0	83	V	1	0	66	0
86	A	1	87	A	1	1	93	I	1	0	84	A	1	1	67	0
87	G	1	88	G	1	1	94	D	1	0	85	G	1	1	68	0
88	W	1	89	W	1	1	95	A	1	0	86	W	1	1	69	0
89	L	1	90	I	0.97	0.02	96	L	1	1	87	L	1	1	70	0.02
90	L	1	91	L	1	1	97	L	1	1	88	L	1	1	71	1
91	G	1	92	G	1	1	98	G	1	1	89	G	1	1	72	1
92	N	1	93	N	1	1	99	D	1	0	90	N	1	1	73	0
93	P	1	94	P	1	1	100	P	1	1	91	P	1	1	74	1
94	E	1	95	E	0.99	0.99	101	Q	0.53	0	92	M	1	0	75	0
95	C	1	96	C	1	1	102	C	1	1	93	C	1	1	76	1
96	D	1	97	E	0.99	0.01	103	D	1	1	94	D	1	1	77	0.01
97	R	1	98	L	0.74	0	104	G	0.98	0	95	E	1	0	78	0
98	L	1	99	L	1	1	104	G	0.98	0	96	F	1	0	78	0
99	L	1	100	I	0.78	0.04	105	F	1	0	97	I	0.95	0.05	79	0
100	S	0.68	101	S	0.97	0.65	106	Q	1	0	98	N	1	0	80	0
101	V	1	102	K	0.9	0.01	107	N	1	0	99	V	1	1	81	0
102	P	1	103	E	0.9	0	108	K	0.94	0	100	P	1	1	82	0
103	E	1	104	S	1	0	109	K	0.58	0.4	101	E	1	1	83	0
104	W	1	105	W	1	1	110	W	1	1	102	W	1	1	84	1
105	S	1	106	S	1	1	111	D	1	0	103	S	1	1	85	0
106	Y	1	107	Y	1	1	112	L	1	0	104	Y	1	1	86	0
107	I	1	108	I	1	1	113	F	1	0	105	I	1	1	87	0
108	M	1	109	V	0.8	0	114	V	0.98	0	106	V	1	0	88	0
109	E	1	110	E	1	1	115	E	1	1	107	E	1	1	89	1
110	K	1	111	T	0.82	0.15	116	R	1	0	108	K	1	1	90	0
111	E	1	112	P	0.97	0	117	S	1	0	109	A	0.94	0	91	0
112	N	1	113	N	0.98	0.98	118	K	0.95	0	110	N	0.87	0.87	92	0
113	P	1	114	P	0.89	0.89	119	A	1	0	111	P	1	1	93	0
114	R	0.94	115	E	0.98	0	119	A	1	0	112	T	0.5	0	93	0
115	D	0.65	116	N	1	0.03	120	Y	0.95	0.3	113	N	0.98	0.03	94	0.03
116	G	0.71	117	G	1	0.71	121	S	1	0.29	114	D	0.87	0.09	95	0.09
117	L	1	118	T	0.94	0	122	N	0.99	0	115	L	1	1	96	0
118	C	1	119	C	1	1	123	C	1	1	116	C	1	1	97	1
119	Y	1	120	Y	1	1	124	Y	1	1	117	Y	1	1	98	1
120	P	1	121	P	1	1	125	P	1	1	118	P	1	1	99	1
121	G	1	122	G	1	1	126	Y	1	0	119	G	1	1	100	0
122	S	0.9	123	Y	0.81	0	127	D	1	0	120	S	0.5	0.48	101	0
123	F	0.94	124	F	1	0.94	128	V	1	0	121	F	1	0.94	102	0
124	N	1	125	A	0.96	0	129	P	0.99	0	122	N	0.99	0.99	103	0
125	D	1	126	D	0.99	0.99	130	D	1	1	123	D	1	1	104	0.99
126	Y	1	127	Y	1	1	131	Y	1	1	124	Y	1	1	105	1
127	E	1	128	E	1	1	132	A	0.93	0	125	E	1	1	106	0
128	E	1	129	E	1	1	133	S	1	0	126	E	1	1	107	0
129	L	1	130	L	1	1	134	L	1	1	127	L	1	1	108	1
130	K	1	131	R	0.99	0.01	135	R	1	0	128	K	1	1	109	0
131	H	0.97	132	E	1	0	136	S	1	0	129	H	1	0.97	110	0
132	L	0.97	133	Q	1	0	137	L	1	0.97	130	L	1	0.97	111	0
133	L	1	134	L	1	1	138	V	0.96	0	131	L	1	1	112	0
134	S	1	135	S	1	1	139	A	1	0	132	S	1	1	113	0
135	S	1	136	S	1	1	140	S	1	1	133	R	1	0	114	0
136	V	1	137	V	0.99	0.99	141	S	1	0	134	I	1	0	115	0
137	K	1	138	S	1	0	142	G	1	0	135	N	1	0	116	0
138	H	1	139	S	1	0	143	T	1	0	136	H	1	1	117	0
139	F	1	140	F	1	1	144	L	1	0	137	F	1	1	118	0
140	E	1	141	E	1	1	145	E	1	1	138	E	1	1	119	1
141	K	1	142	R	1	0	146	F	1	0	139	K	1	1	120	0
142	V	1	143	F	1	0	147	N	0.74	0	140	I	0.9	0	121	0
143	K	0.9	144	E	1	0	148	N	0.96	0.02	141	Q	1	0	122	0
144	I	1	145	I	0.99	0.99	149	E	1	0	142	I	1	1	123	0
145	L	1	146	F	1	0	150	S	0.74	0	143	I	1	0	124	0
146	P	1	147	P	1	1	151	F	1	0	144	P	0.99	0.99	125	0
147	K	1	148	K	1	1	152	N	0.91	0	145	K	1	1	126	0
148	D	1	149	E	0.89	0	153	W	1	0	146	S	0.97	0	127	0
149	R	0.97	150	S	0.96	0.04	153	W	1	0	147	S	1	0	127	0
150	W	1	152	W	1	1	153	W	1	1	148	W	1	1	127	1
151	T	1	153	P	1	0	154	T	0.99	0.99	149	S	0.99	0	128	0
152	Q	1	154	N	0.92	0	155	G	1	0	150	D	0.68	0	129	0
153	H	1	155	H	1	1	156	V	1	0	151	H	1	1	130	0
154	T	0.97	156	T	0.92	0.89	157	T	0.6	0.58	152	E	0.9	0.03	131	0.03
155	T	1	157	V	0.91	0.06	158	Q	1	0	153	A	0.98	0	132	0
156	T	1	158	T	0.97	0.97	159	N	0.77	0	154	S	1	0	133	0
157	G	1	159	K	0.74	0	160	G	1	1	155	S	0.68	0	134	0
158	G	1	160	G	1	1	161	T	0.78	0.1	156	G	1	1	135	0.1
159	S	1	162	S	0.77	0.77	162	S	1	1	158	S	1	1	136	0.77
160	R	0.71	163	A	0.98	0	163	S	0.68	0	159	S	0.99	0	137	0
161	A	1	164	S	0.95	0.05	164	A	0.95	0.95	160	A	0.99	0.99	138	0.05
162	C	1	165	C	1	1	165	C	1	1	161	C	1	1	139	1
163	A	1	166	S	0.99	0	166	K	0.95	0	162	P	0.99	0	140	0
164	V	1	167	H	0.99	0	167	R	1	0	163	Y	1	0	141	0
165	S	1	168	N	0.9	0	168	R	0.72	0	164	L	0.71	0	142	0
166	G	1	169	G	0.99	0.99	169	S	0.98	0	165	G	0.99	0.99	143	0
167	N	0.74	170	K	0.88	0.2	170	N	0.57	0.42	166	S	0.5	0.05	144	0.05
168	P	1	171	S	0.98	0	171	N	0.48	0	167	P	0.53	0.53	145	0
169	S	1	172	S	1	1	172	S	0.98	0.98	168	S	1	1	146	0.98
170	F	1	173	F	1	1	173	F	1	1	169	F	1	1	147	1
171	F	1	174	Y	1	0	174	F	1	1	170	F	1	1	148	0
172	R	1	175	R	0.76	0.76	175	S	1	0	171	R	1	1	149	0
173	N	1	176	N	1	1	176	R	1	0	172	N	1	1	150	0
174	M	1	177	L	1	0	177	L	1	0	173	V	1	0	151	0
175	V	0.94	178	L	0.98	0.01	178	N	1	0	174	V	1	0.94	152	0
176	W	1	179	W	1	1	179	W	1	1	175	W	1	1	153	1
177	L	1	180	L	1	1	180	L	1	1	176	L	1	1	154	1
178	T	1	181	T	0.99	0.99	181	T	0.54	0.54	177	I	0.99	0.01	155	0.01
179	K	0.81	182	G	0.71	0.07	182	H	0.51	0.19	178	K	1	0.81	156	0.07
180	K	0.9	183	K	0.98	0.88	183	L	0.89	0	179	K	1	0.9	157	0
181	G	0.94	184	N	0.97	0.01	184	K	0.72	0.03	180	N	0.96	0	158	0
182	S	0.68	185	G	0.98	0	185	Y	0.59	0.03	181	S	0.79	0.54	159	0
183	N	0.71	186	L	0.92	0	186	K	0.97	0	182	T	0.85	0	160	0
184	Y	1	187	Y	1	1	187	Y	1	1	183	Y	1	1	161	1
185	P	1	188	P	1	1	188	P	1	1	184	P	1	1	162	1
186	V	1	189	N	0.94	0	189	A	0.96	0.03	185	T	1	0	163	0
187	A	1	190	L	1	0	190	L	0.99	0	186	I	1	0	164	0
188	K	1	191	S	0.98	0	191	N	1	0	187	K	1	1	165	0
189	G	0.97	192	K	0.89	0	192	V	1	0	188	R	0.5	0.02	166	0
190	S	1	193	S	1	1	193	T	0.99	0	189	S	1	1	167	0
191	Y	1	194	Y	1	1	194	M	1	0	190	Y	1	1	168	0
192	N	1	195	A	0.61	0	195	P	1	0	191	N	1	1	169	0
193	N	1	196	N	1	1	196	N	1	1	192	N	1	1	170	1
194	T	1	197	N	0.98	0	197	N	0.99	0	193	T	1	1	171	0
195	S	1	198	K	0.98	0	198	E	0.66	0	194	N	1	0	172	0
196	G	1	199	E	0.95	0.02	199	K	0.93	0	195	Q	1	0	173	0
197	E	1	200	K	1	0	200	F	0.99	0	196	E	1	1	174	0
198	Q	1	201	E	1	0	201	D	1	0	197	D	1	0	175	0
199	M	0.97	202	V	0.99	0	202	K	1	0	198	L	1	0	176	0
200	L	1	203	L	1	1	203	L	1	1	199	L	1	1	177	1
201	I	1	204	V	0.92	0.08	204	Y	1	0	200	V	0.97	0.03	178	0
202	I	1	205	L	1	0	205	I	1	1	201	L	0.92	0	179	0
203	W	1	206	W	1	1	206	W	1	1	202	W	1	1	180	1
204	G	1	207	G	1	1	207	G	1	1	203	G	1	1	181	1
205	V	1	208	V	0.98	0.98	208	V	0.99	0.99	204	I	0.98	0	182	0
206	H	1	209	H	1	1	209	H	1	1	205	H	1	1	183	1
207	H	1	210	H	0.99	0.99	210	H	1	1	206	H	1	1	184	0.99
208	P	1	211	P	1	1	211	P	1	1	207	P	0.96	0.96	185	0.96
209	N	0.81	212	P	0.75	0	212	G	0.59	0	208	N	0.99	0.8	186	0
210	D	0.97	213	N	0.98	0	213	T	1	0	209	D	0.9	0.87	187	0
211	E	1	214	I	0.96	0	214	D	0.95	0	210	A	0.92	0.07	188	0
212	T	0.55	215	G	0.9	0.01	215	S	0.54	0	211	A	0.97	0.31	189	0
213	E	1	216	D	0.82	0.01	216	D	0.9	0.08	212	E	1	1	190	0.01
214	Q	1	217	Q	1	1	217	Q	1	1	213	Q	1	1	191	1
215	R	0.97	218	R	0.88	0.85	218	I	0.65	0	214	T	0.96	0	192	0
216	T	0.74	219	A	0.83	0.3	219	S	0.78	0	215	R	0.69	0	193	0
217	L	1	220	L	0.76	0.76	220	L	0.98	0.98	216	L	1	1	194	0.76
218	Y	1	221	Y	1	1	221	Y	0.99	0.99	217	Y	1	1	195	0.99
219	Q	1	222	H	0.9	0.02	222	A	0.71	0	218	Q	1	1	196	0
220	N	0.71	223	T	0.92	0.02	223	Q	0.82	0	219	N	1	0.71	197	0
221	V	1	224	E	0.97	0	224	A	0.98	0	220	P	1	0	198	0
222	G	1	225	N	0.97	0	225	S	1	0	221	T	1	0	199	0
223	T	1	226	A	1	0	226	G	1	0	222	T	0.99	0.99	200	0
224	Y	1	227	Y	1	1	227	R	0.97	0	223	Y	1	1	201	0
225	V	1	228	V	0.99	0.99	228	I	0.54	0.46	224	I	0.99	0.01	202	0.01
226	S	1	229	S	0.99	0.99	229	T	1	0	225	S	1	1	203	0
227	V	0.68	230	V	1	0.68	230	V	1	0.68	226	I	0.5	0.34	204	0.34
228	G	0.61	231	V	0.98	0.07	231	S	1	0.26	227	G	1	0.61	205	0.07
229	T	1	232	S	0.99	0.01	232	T	1	1	228	T	1	1	206	0.01
230	S	1	233	S	1	1	233	K	0.98	0	229	S	1	1	207	0
231	T	1	234	H	0.94	0	234	R	1	0	230	T	1	1	208	0
232	L	1	235	Y	1	0	235	S	0.99	0	231	L	1	1	209	0
233	N	0.97	236	S	0.9	0.09	236	Q	1	0	232	N	1	0.97	210	0
234	K	1	237	R	0.99	0.01	237	Q	1	0	233	Q	0.99	0	211	0
235	R	1	238	R	0.84	0.84	238	T	1	0	234	R	1	1	212	0
236	S	1	239	F	1	0	239	V	0.97	0	235	L	1	0	213	0
237	T	0.81	240	T	0.98	0.79	240	I	0.98	0.21	236	V	1	0	214	0
238	P	1	241	P	1	1	241	P	1	1	237	P	1	1	215	1
239	E	0.74	242	E	1	0.74	242	N	0.95	0.01	238	K	0.7	0.1	216	0.01
240	I	1	243	I	1	1	243	I	0.99	0.99	239	I	0.97	0.97	217	0.97
241	A	1	244	A	0.89	0.89	244	G	0.99	0	240	A	1	1	218	0
242	T	0.74	245	K	0.95	0.01	245	S	0.94	0	241	T	1	0.74	219	0
243	R	1	246	R	1	1	246	R	0.98	0.98	242	R	1	1	220	0.98
244	P	0.87	247	P	1	0.87	247	P	1	0.87	243	S	0.9	0.08	221	0.08
245	K	0.84	248	K	1	0.84	248	R	0.55	0	244	K	1	0.84	222	0
246	V	0.97	249	V	1	0.96	249	V	0.98	0.95	245	V	0.99	0.96	223	0.95
247	N	0.94	250	R	1	0	250	R	1	0	246	N	1	0.94	224	0
248	G	0.94	251	D	0.88	0.09	251	G	0.45	0.43	247	G	1	0.94	225	0.09
249	L	0.61	252	Q	0.99	0.35	252	V	0.41	0.11	248	Q	0.99	0.35	226	0.11
250	G	1	253	E	0.94	0	253	S	0.64	0	249	S	0.96	0	227	0
251	S	0.58	254	G	1	0.39	254	S	1	0.58	250	G	1	0.39	228	0.39
252	R	1	255	R	1	1	255	R	0.98	0.98	251	R	1	1	229	0.98
253	M	1	256	I	0.96	0.04	256	I	1	0	252	M	0.99	0.99	230	0
254	E	1	257	N	0.99	0	257	S	1	0	253	E	0.97	0.97	231	0
255	F	1	258	Y	1	0	258	I	1	0	254	F	1	1	232	0
256	S	1	259	Y	1	0	259	Y	1	0	255	F	1	0	233	0
257	W	1	260	W	1	1	260	W	1	1	256	W	1	1	234	1
258	T	1	261	T	1	1	261	T	1	1	257	T	0.95	0.95	235	0.95
259	L	1	262	L	1	1	262	I	1	0	258	I	1	0	236	0
260	L	1	263	L	0.99	0.99	263	V	1	0	259	L	1	1	237	0
261	D	1	264	E	0.99	0	264	K	1	0	260	K	0.88	0	238	0
262	M	0.84	265	P	1	0	265	P	1	0	261	P	1	0	239	0
263	W	1	266	G	0.99	0	266	G	1	0	262	N	1	0	240	0
264	D	1	267	D	1	1	267	D	1	1	263	D	1	1	241	1
265	T	0.97	268	T	0.99	0.96	268	I	0.98	0	264	A	1	0	242	0
266	I	1	269	I	1	1	269	L	1	0	265	I	1	1	243	0
267	N	0.94	270	I	0.98	0	270	L	0.98	0	266	N	1	0.94	244	0
268	F	1	271	F	1	1	271	I	1	0	267	F	1	1	245	0
269	E	1	272	E	1	1	272	N	0.98	0	268	E	1	1	246	0
270	S	1	273	A	0.99	0	273	S	1	1	269	S	1	1	247	0
271	T	1	274	N	0.97	0.02	274	T	0.97	0.97	270	N	1	0	248	0
272	G	1	275	G	1	1	275	G	1	1	271	G	1	1	249	1
273	N	1	276	N	1	1	276	N	1	1	272	N	1	1	250	1
274	L	1	277	L	1	1	277	L	1	1	273	F	1	0	251	0
275	I	0.65	278	I	0.99	0.64	278	I	1	0.64	274	I	1	0.64	252	0.64
276	A	1	279	A	0.99	0.99	279	A	1	1	275	A	1	1	253	0.99
277	P	1	280	P	1	1	280	P	1	1	276	P	1	1	254	1
278	E	1	281	R	0.51	0	281	R	1	0	277	E	1	1	255	0
279	Y	1	282	Y	0.76	0.76	282	G	1	0	278	Y	0.96	0.96	256	0
280	G	1	283	A	1	0	283	Y	1	0	279	A	1	0	257	0
281	F	1	284	F	1	1	284	F	1	1	280	Y	1	0	258	0
282	K	0.97	285	A	1	0	285	K	1	0.96	281	K	1	0.97	259	0
283	I	1	286	L	0.99	0	286	I	0.97	0.97	282	I	0.97	0.97	260	0
284	S	1	287	S	0.97	0.97	287	R	0.99	0	283	V	1	0	261	0
285	K	1	288	R	1	0	287	R	0.99	0	284	K	1	1	261	0
286	R	1	289	G	0.99	0	288	S	0.77	0	285	K	1	0	262	0
287	G	1	290	F	0.95	0	289	G	1	1	286	G	1	1	263	0
288	S	1	291	G	0.98	0	290	K	1	0	287	D	1	0	264	0
289	S	1	292	S	1	1	291	S	1	1	288	S	1	1	265	1
290	G	1	293	G	1	1	292	S	1	0	289	A	0.67	0	266	0
291	I	1	294	I	1	1	293	I	0.99	0.99	290	I	1	1	267	0.99
292	M	0.97	295	I	1	0	294	M	1	0.97	291	M	0.99	0.96	268	0
293	K	0.97	296	T	0.84	0.03	295	R	0.99	0.01	292	K	1	0.97	269	0.01
294	T	1	297	S	1	0	296	S	1	0	293	S	1	0	270	0
295	E	1	298	N	0.98	0	297	D	0.97	0	294	E	1	1	271	0
296	G	1	299	A	0.99	0	298	A	1	0	295	L	0.97	0	272	0
297	T	1	300	P	0.8	0	299	P	0.99	0	296	E	1	0	273	0
298	L	1	301	M	0.98	0	300	I	1	0	297	Y	1	0	274	0
299	E	0.81	302	D	0.82	0.02	301	G	0.92	0.18	298	G	0.96	0.19	275	0.02
300	N	1	303	E	0.93	0	302	K	0.72	0.18	299	N	0.9	0.9	276	0
301	C	1	304	C	1	1	303	C	1	1	300	C	1	1	277	1
302	E	1	305	D	0.98	0	304	N	0.79	0	301	N	1	0	278	0
303	T	1	306	A	0.93	0.06	305	S	1	0	302	T	1	1	279	0
304	K	1	307	K	0.99	0.99	306	E	1	0	303	K	1	1	280	0
305	C	0.97	308	C	1	0.97	307	C	1	0.97	304	C	1	0.97	281	0.97
306	Q	1	309	Q	1	1	308	I	1	0	305	Q	1	1	282	0
307	T	1	310	T	1	1	309	T	1	1	306	T	1	1	283	1
308	P	1	311	P	1	1	310	P	1	1	307	P	1	1	284	1
309	L	1	312	Q	0.97	0.01	311	N	1	0	308	M	0.93	0	285	0
310	G	1	313	G	1	1	312	G	1	1	309	G	1	1	286	1
311	A	1	314	A	1	1	313	S	1	0	310	A	1	1	287	0
312	I	1	315	I	1	1	314	I	1	1	311	I	1	1	288	1
313	N	0.94	316	N	1	0.93	315	P	0.99	0	312	N	1	0.94	289	0
314	T	1	317	S	0.99	0.01	316	N	1	0	313	S	1	0	290	0
315	T	1	318	S	1	0	317	D	0.99	0	314	S	1	0	291	0
316	L	1	319	L	1	1	318	K	1	0	315	M	1	0	292	0
317	P	1	320	P	1	1	319	P	1	1	316	P	1	1	293	1
318	F	1	321	F	1	1	320	F	1	1	317	F	0.99	0.99	294	0.99
319	H	1	322	Q	1	0	321	Q	1	0	318	H	1	1	295	0
320	N	1	323	N	1	1	322	N	1	1	319	N	1	1	296	1
321	V	1	324	V	0.95	0.95	323	V	1	1	320	I	1	0	297	0
322	H	1	325	H	1	1	324	N	1	0	321	H	1	1	298	0
323	P	1	326	P	1	1	325	R	0.94	0	322	P	1	1	299	0
324	L	1	327	V	0.99	0	326	I	1	0	323	L	1	1	300	0
325	T	1	328	T	1	1	327	T	1	1	324	T	1	1	301	1
326	I	1	329	I	1	1	328	Y	1	0	325	I	1	1	302	0
327	G	1	330	G	1	1	329	G	1	1	326	G	1	1	303	1
328	E	1	331	E	1	1	330	A	0.97	0	327	E	1	1	304	0
329	C	1	332	C	1	1	331	C	1	1	328	C	1	1	305	1
330	P	1	333	P	1	1	332	P	1	1	329	P	1	1	306	1
331	K	0.97	334	K	1	0.97	333	R	0.97	0.06	330	K	1	0.97	307	0.06
332	Y	1	335	Y	1	1	334	Y	1	1	331	Y	1	1	308	1
333	V	1	336	V	0.99	0.99	335	V	0.99	0.99	332	V	1	1	309	0.99
334	K	1	337	R	0.98	0.02	336	K	0.99	0.99	333	K	1	1	310	0.02
335	S	1	338	S	1	1	337	Q	1	0	334	S	1	1	311	0
336	E	1	339	A	0.76	0	338	N	0.99	0	335	N	0.97	0	312	0
337	K	1	340	K	1	1	339	T	1	0	336	R	0.96	0.04	313	0
338	L	1	341	L	1	1	340	L	1	1	337	L	1	1	314	1
339	V	1	342	R	1	0	341	K	1	0	338	V	1	1	315	0
340	L	1	343	M	1	0	342	L	1	1	339	L	1	1	316	0
341	A	1	344	V	0.9	0.1	343	A	1	1	340	A	1	1	317	0.1
342	T	1	345	T	0.99	0.99	344	T	1	1	341	T	0.98	0.98	318	0.98
343	G	1	346	G	1	1	345	G	1	1	342	G	1	1	319	1
344	L	1	347	L	1	1	346	M	1	0	343	L	1	1	320	0
345	R	1	348	R	0.99	0.99	347	R	1	1	344	R	1	1	321	0.99
346	N	1	349	N	1	1	348	N	1	1	345	N	1	1	322	1
347	V	1	350	I	0.99	0	349	V	0.99	0.99	346	S	0.9	0	323	0
348	P	1	351	P	1	1	350	P	1	1	347	P	1	1	324	1
349	Q	1	352	S	1	0	351	E	1	0	348	Q	0.96	0.96	325	0
350	I	1	353	I	0.99	0.99	352	K	0.98	0	349	R	0.95	0	326	0
351	E	1	354	Q	0.99	0	353	Q	1	0	350	E	1	1	327	0
352	S	1	355	S	1	1	354	T	1	0	351	S	0.5	0.5	328	0
